# Supplementary material for: Lithium storage in a metal organic framework with diamondoid topology – a case study on metal formates
Source: Royal Society of Chemistry journal article supplement (doi:10.1039/c0jm01671c), 2010-01-01
Supplement: c0jm01671c.pdf [file c0jm01671c.pdf]

## Lithium storage in metal organic framework with diamondoid topology – A case study on metal formates

Kuppan Saravanan, Mangayarkarasi Nagarathinam, Palani Balaya\* and Jagadese J. Vittal\*

### Supporting Information

#### Gibb's free energy calculations:

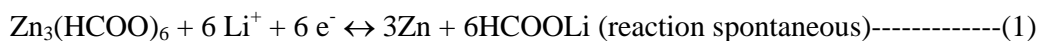

| Zinc formate<br>(KJ/mol) | Lithium formate<br>(KJ/mol) | $\Delta G = \Delta G_p - \Delta G_r$<br>(KJ/mol) |
|--------------------------|-----------------------------|--------------------------------------------------|
| -864.8                   | -612                        | -360 KJ/mol                                      |

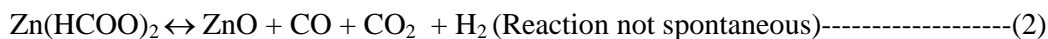

| Zinc formate<br>(KJ/mol) | ZnO<br>(KJ/mol) | CO <sub>2</sub><br>(KJ/mol) | CO<br>(KJ/mol) | H <sub>2</sub><br>(KJ/mol) | $\Delta G = \Delta G_p - \Delta G_r$<br>(KJ/mol) |
|--------------------------|-----------------|-----------------------------|----------------|----------------------------|--------------------------------------------------|
| -864.8                   | -307            | -394                        | -137           | 0                          | +26 KJ/mol                                       |

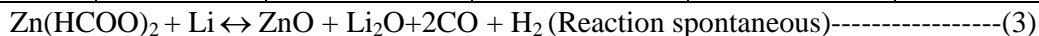

| Zinc formate<br>(KJ/mol) | Li <sub>2</sub> O<br>(KJ/mol) | ZnO<br>(KJ/mol) | CO<br>(KJ/mol) | H <sub>2</sub><br>(KJ/mol) | $\Delta G = \Delta G_p - \Delta G_r$<br>(KJ/mol) |
|--------------------------|-------------------------------|-----------------|----------------|----------------------------|--------------------------------------------------|
| -864.8                   | -367                          | -307            | -137           | 0                          | -84 KJ/mol                                       |

From this calculation it is clear that formation of lithium formate (eqn-1) is more favourable than ZnO/Li<sub>2</sub>O formation (eqn-3).

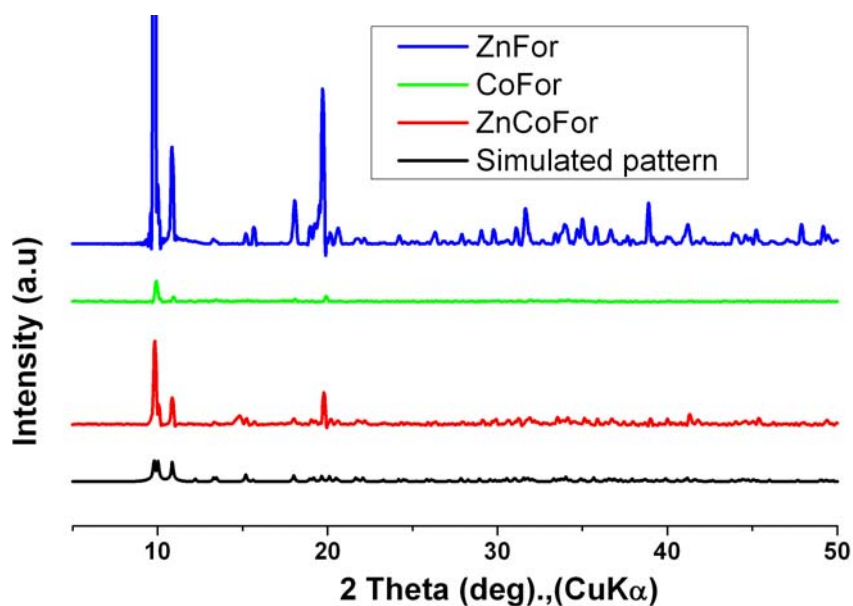

**Fig. S1** PXR D patterns of MFor [M = Zn (FOR1), Co (FOR3) and ZnCo (FOR4)] with their simulated PXR D pattern.

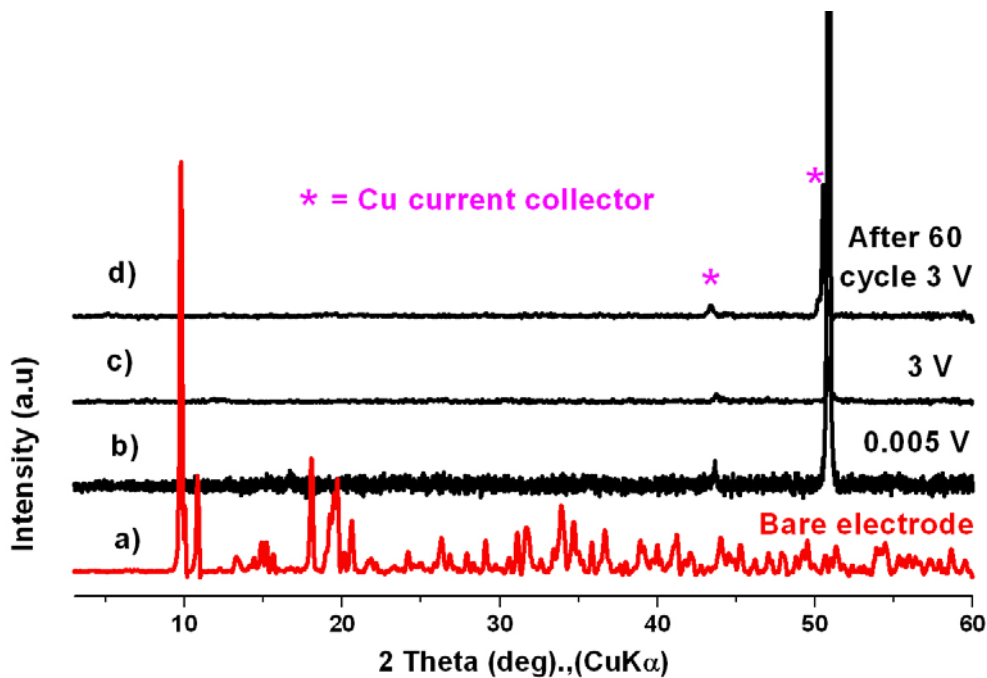

**Fig S2** Ex-situ PXR D patterns of the electrodes of bare FOR1, and those b) discharged to 0.005 V, c) charged to 3.0 V and d) after 60 cycles. Lines due to Cu-current collector are marked with \*.

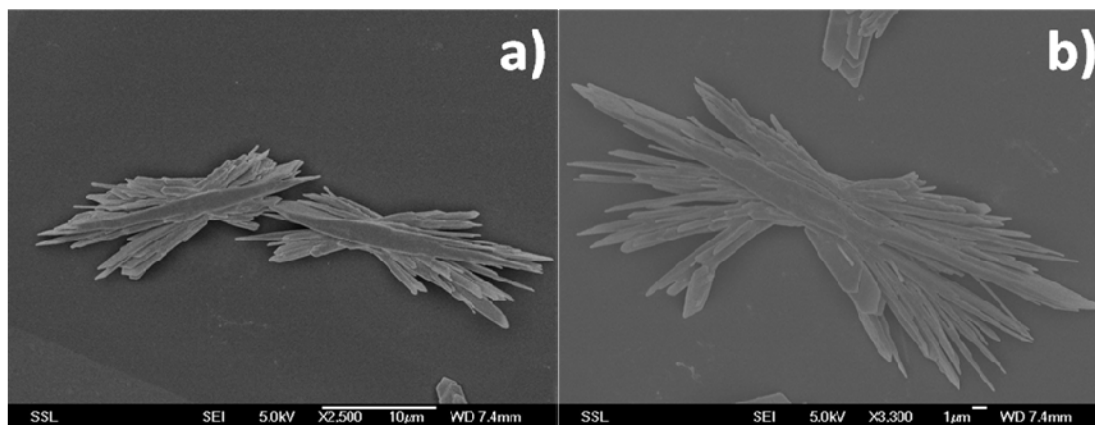

**Fig.S3** FESEM images of the FOR1  $[\text{Zn}_3(\text{HCOO})_6]$  plates at two different magnifications

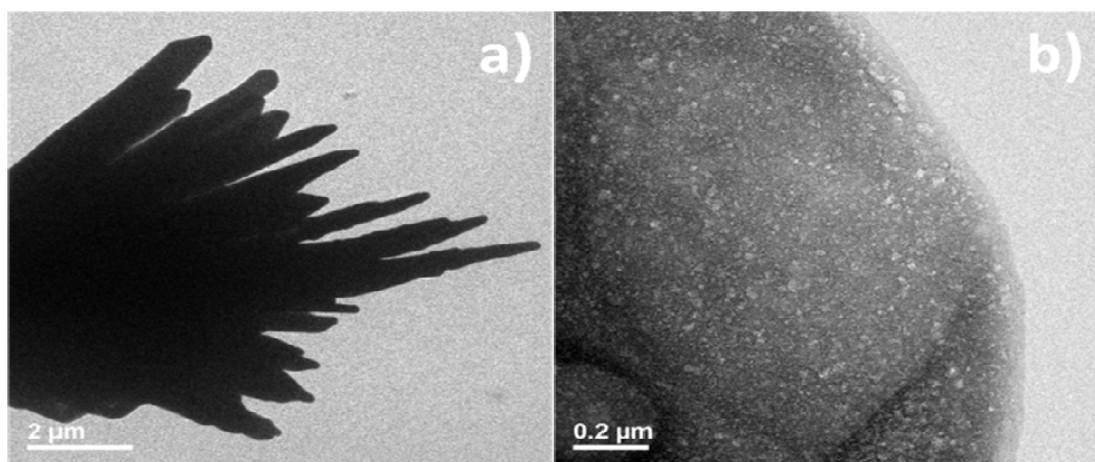

**Fig. S4** TEM images of the diamondoid FOR1  $[\text{Zn}_3(\text{HCOO})_6]$  at two different magnifications

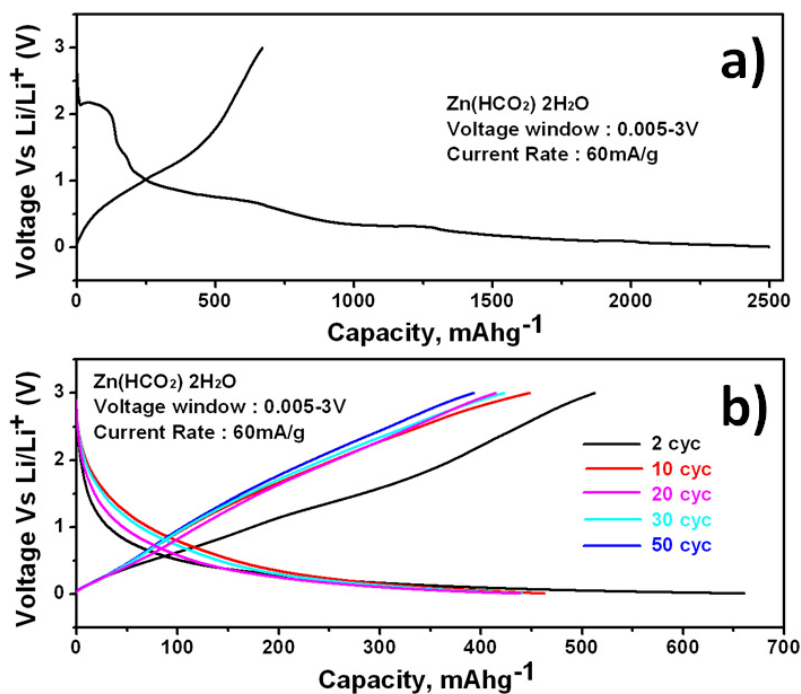

**Fig. S5** Galvanostatic charge–discharge cycle curves for FOR2 (a) 1<sup>st</sup> cycle and (b) selected cycles. (Current density of 60 mA/g (0.11C) plot. Potential window 0.005 – 3 V, recorded at room temperature)

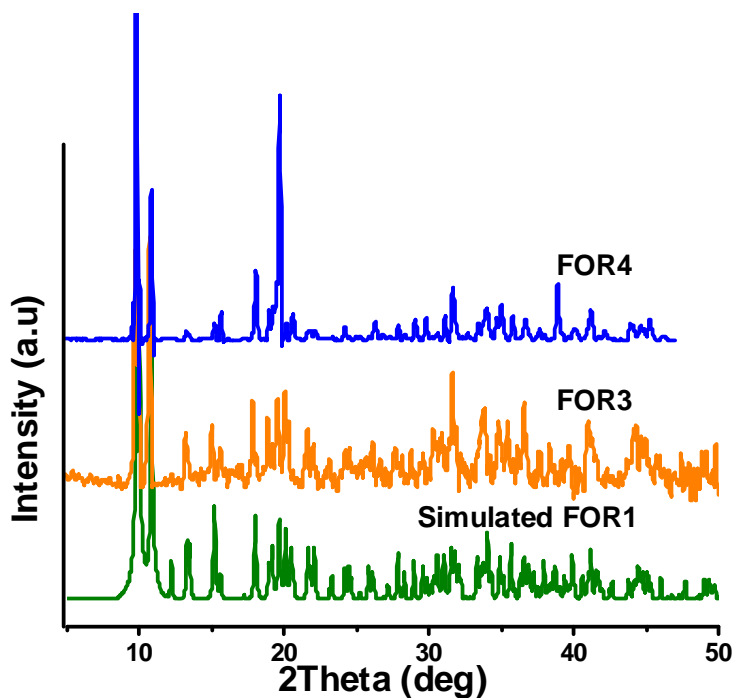

**Figure S6** PXRD patterns of FOR1, FOR3 and FOR4

### FTIR of ZnO

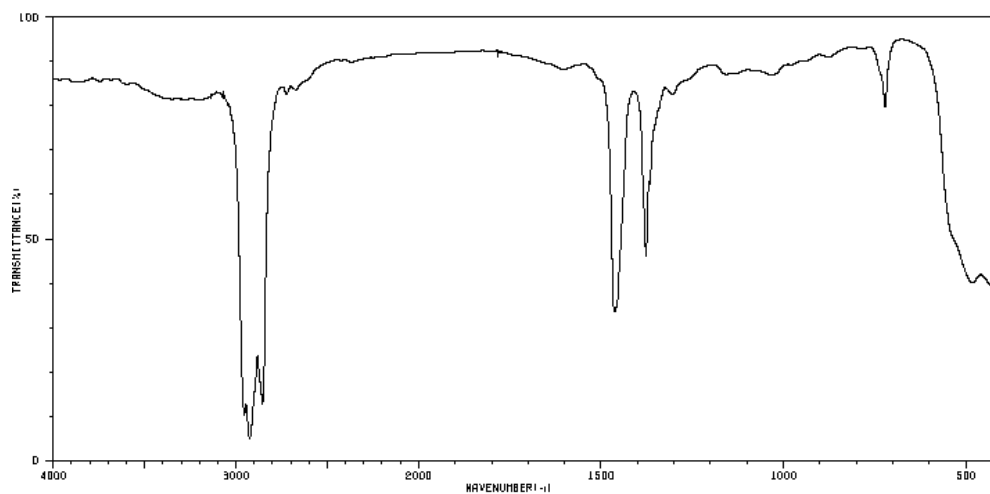

**CAS Registry Number:** 1314-13-2

**Formula:** Zn O

**CA Index Name:** Zinc oxide (ZnO)

**SpectrumID:** NIDA69905

**Spectrometer:** Nicolet 170SX or JASCO FT/IR-410

**Source:** Integrated Spectral Database System of Organic Compounds. (Data were obtained from the National Institute of Advanced Industrial Science and Technology (Japan))
